# Supplementary material for: Epilation for Trachomatous Trichiasis and the Risk of Corneal Opacification
Source: PubMed Central journal article supplement (PMC3694301; doi:10.1016/j.ophtha.2011.06.045), 2012-01
Supplement: mmc1.pdf [file mmc1.pdf]

| Sign                                                     | Definition                                                                                                        | World Health Organisation (WHO) equivalent grade                                      |       |
|----------------------------------------------------------|-------------------------------------------------------------------------------------------------------------------|---------------------------------------------------------------------------------------|-------|
| Entropion (assessed with eye in primary position)        |                                                                                                                   |                                                                                       |       |
| E0 (none)                                                | None                                                                                                              | No WHO grading system for entropion                                                   |       |
| E1 (mild)                                                | <50 % of lid margin rolled inwards without cornea - lash base contact                                             |                                                                                       |       |
| E2 (moderate)                                            | >50% of lid margin rolled inwards without cornea –lash base contact                                               |                                                                                       |       |
| E3 (severe)                                              | Lid margin rolled inwards with <50% lash base – cornea contact                                                    |                                                                                       |       |
| E4 (severe)                                              | Lid margin rolled inwards with >50% lash base – cornea contact                                                    |                                                                                       |       |
| Corneal scarring (assessed with eye in primary position) |                                                                                                                   |                                                                                       |       |
| CO-0                                                     | None                                                                                                              | CC0                                                                                   |       |
| CO-1                                                     | Opacity Location: Opacity, outside central 4mm of cornea<br>Opacity Density: Any                                  | 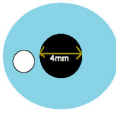   | CC1   |
| CO-2a                                                    | Location: Within central 4mm, but not entering central 1mm.<br>Density: Pupil margin visible through opacity.     |   | } CC2 |
| CO-2b                                                    | Location: Within central 4mm, but not entering central 1mm.<br>Density: Pupil margin not visible through opacity. |  |       |
| CO-2c                                                    | Location: Overlying central 1mm, i.e. visual axis<br>Density: Pupil margin visible through opacity.               |  |       |
| CO-2d                                                    | Location: Overlying central 1mm, i.e. visual axis<br>Density: Pupil margin not visible through opacity.           |  |       |
| CO-3                                                     | Location: All of central 4mm<br>Density: Pupil margin not visible through opacity                                 |  | CC3   |
| CO-4                                                     | Phthisis                                                                                                          | No WHO grade                                                                          |       |

**Fig 1: Expanded grading system and WHO grading system equivalents**
